# Supplementary figures and images for: Hydrothermal synthesis and Cl2 sensing performance of porous-sheets-like In2O3 structures with phase transformation
Source: Royal Society of Chemistry journal article supplement (doi:10.1039/c7ra10201a), 2017-01-01

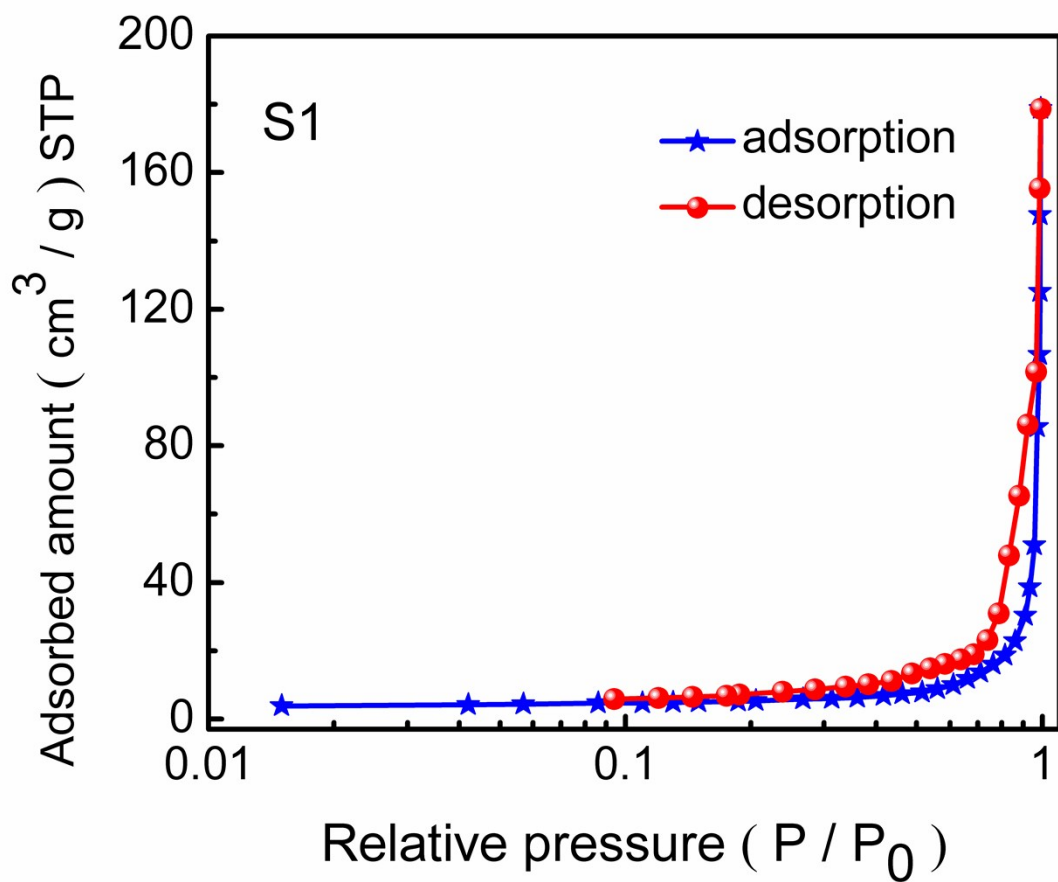

**FIG. A1**

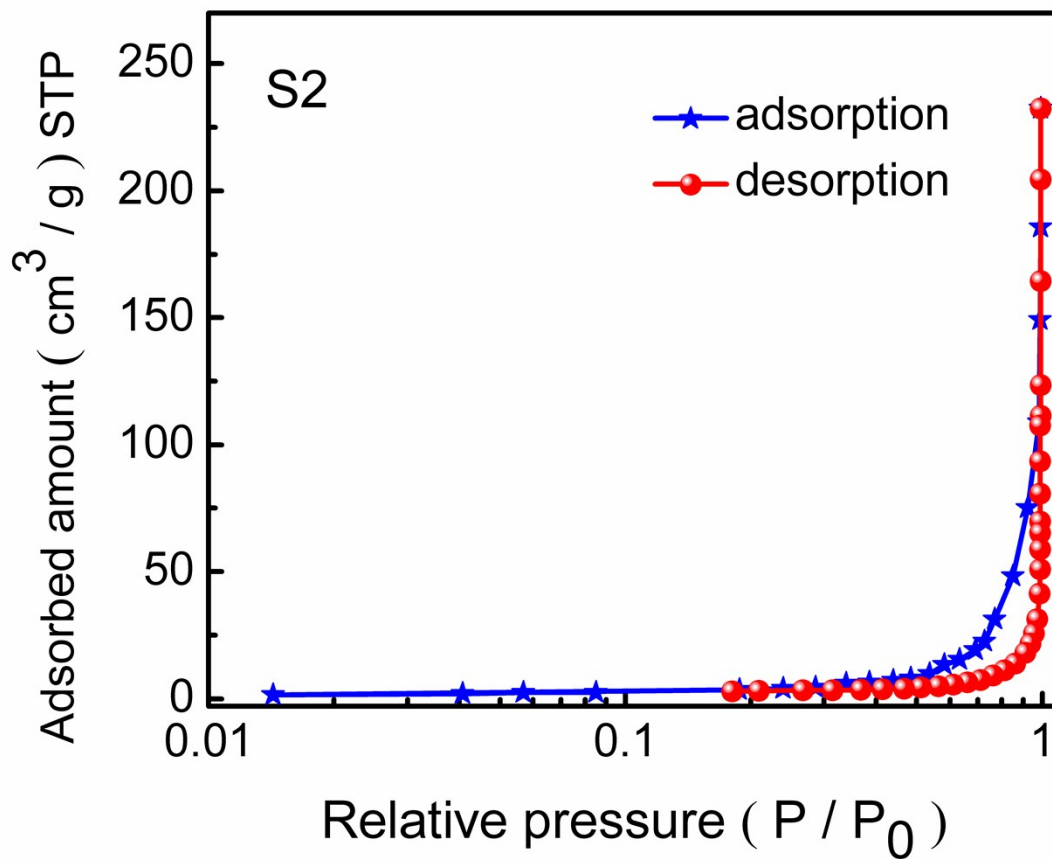

FIG. A2

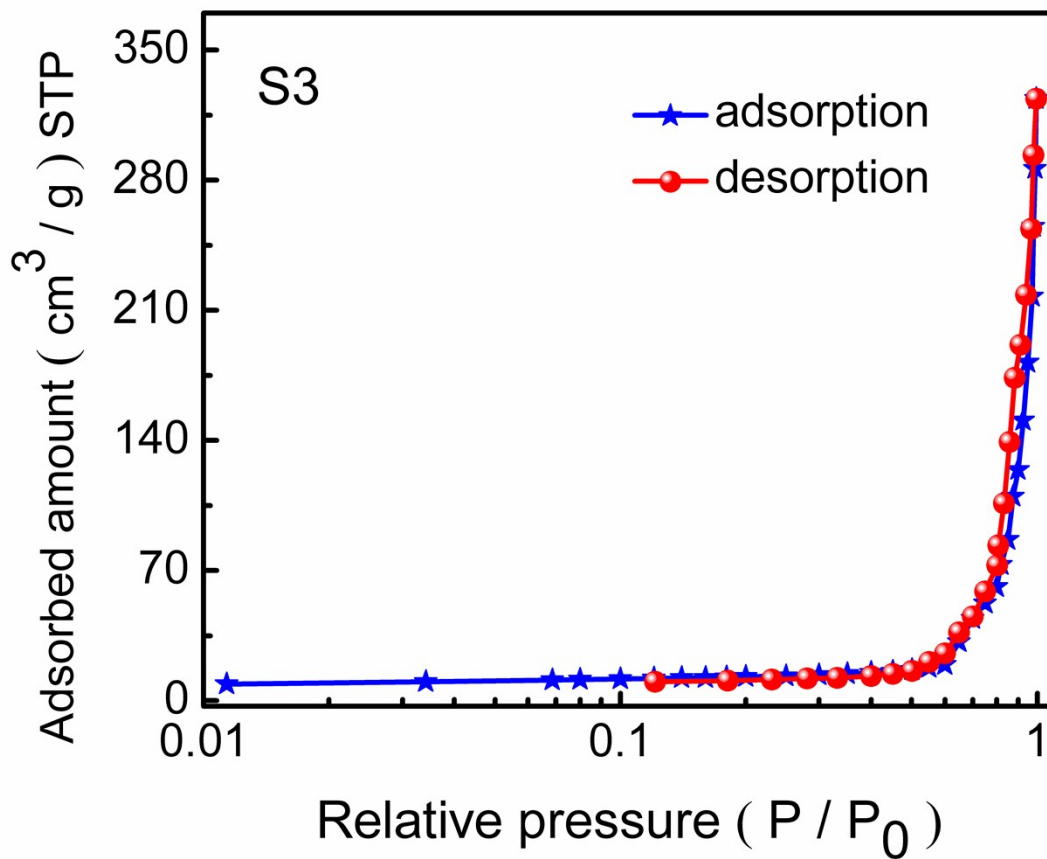

FIG. A3

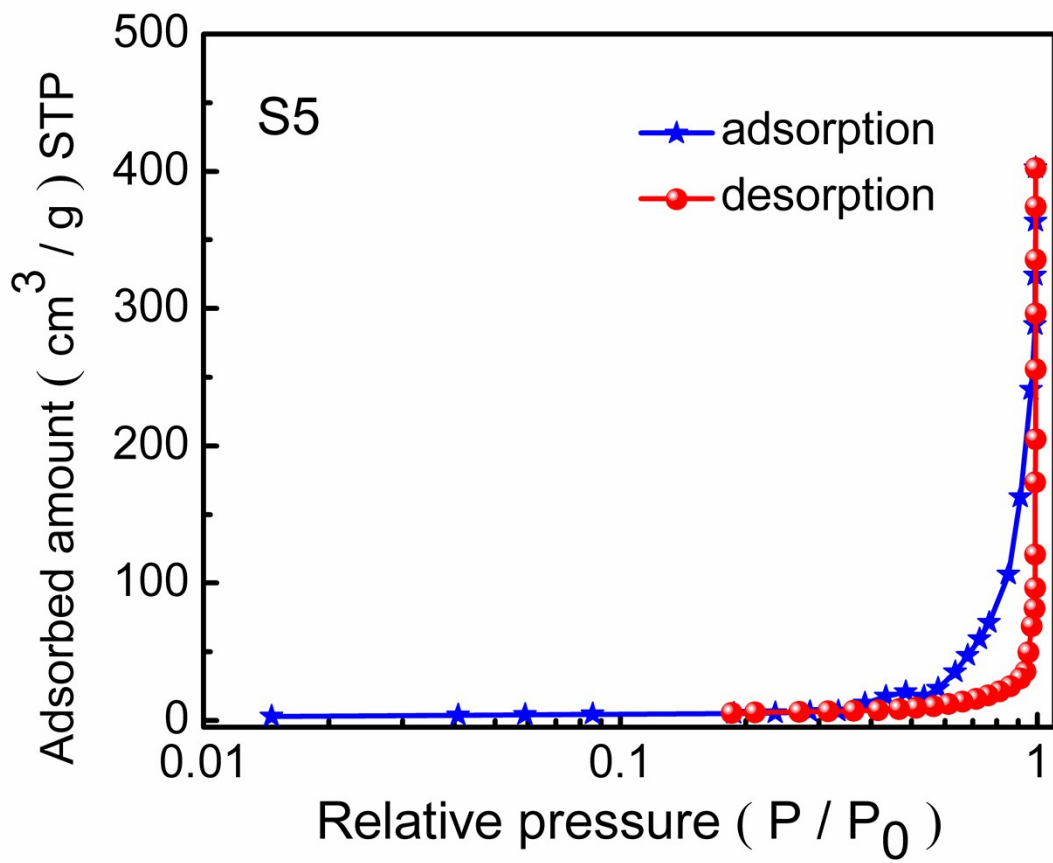

FIG. A4

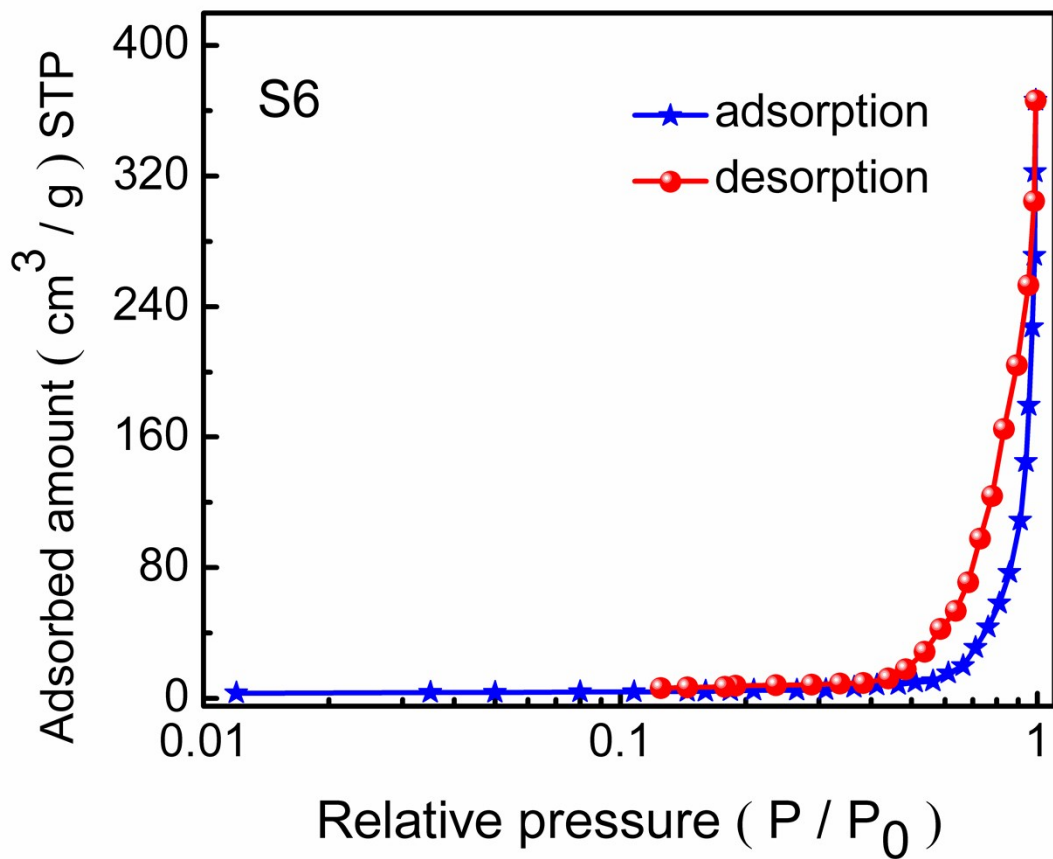

FIG. A5

Supplement: c7ra10201a1.pdf [file c7ra10201a1.pdf]
